# Supplementary material for: The Influence of Transtibial Prosthesis Type on Lower-Body Gait Adaptation: A Case Study
Source: MDPI journal article supplement (doi:10.3390/ijerph20010439), 2022-12-27
Supplement: s1 [file s1]

## Supplementary materials

**Table S1.** Description of tested prostheses.

|                                 | <b>Variflex LP<br/>(Össur)</b>                                                                                                                               | <b>Meridium<br/>(OttoBock)</b>                                                                                                | <b>Echelon VT<br/>(Blatchford)</b>                                                                            | <b>Kinterra<br/>(Freedom Innovations)</b>                                                                                 |
|---------------------------------|--------------------------------------------------------------------------------------------------------------------------------------------------------------|-------------------------------------------------------------------------------------------------------------------------------|---------------------------------------------------------------------------------------------------------------|---------------------------------------------------------------------------------------------------------------------------|
| <b>Category</b>                 | Energy Storage and return foot                                                                                                                               | A microprocessor-controlled prosthetic                                                                                        | A dynamic carbon fibre foot comprising independent toe and heel springs with a hydraulic self-aligning ankle. | Combine a hydraulic articulation unit with an energy-storage-and-return foot                                              |
| <b>Degrees of freedom</b>       | The Variflex LP does not offer assisted ankle plantar/dorsal flexion. The patient must exert a force on the carbon plate which will induce an energy return. | A 4-axis mechatronic foot with hydraulic movement of the ankle. It offers 36.5 degrees of plantar-flexion and dorsal-flexion. | A hydraulic foot that offers 9 degrees of plantar-flexion and dorsi-flexion.                                  | A hydraulic foot that offers 12 degrees of ankle mobility.                                                                |
| <b>Prosthesis specification</b> | This prosthesis was combined to DeltaTwist shock absorber, which also features a torsion function.                                                           | The Meridium automatically adjusts to different types of walking, changes in inclination and different walking speeds.        | The Echelon VT offers shock absorption and a rotation adapter included in the foot.                           | The Kinterra foot was combined with a durashock. This piece of elastomer serves as a shock absorber and rotation adapter. |
